# Supplementary material
Source: publisher figshare collection journal article supplement (https://acs.figshare.com/ndownloader/files/4006186)
Supplement: Supplementary file 1 [file 4006186]

# Multistep Thickening of Nafion Thin Films in Water

*Yudai Ogata,<sup>†</sup> Daisuke Kawaguchi,<sup>§</sup> Norifumi L. Yamada<sup>||</sup> and Keiji Tanaka<sup>\*†‡</sup>*

<sup>†</sup>Department of Applied Chemistry and <sup>§</sup>Education Center for Global Leaders in Molecular System for Devices, Kyushu University, Fukuoka 819-0395, Japan, <sup>||</sup>Neutron Science Laboratory, High Energy Accelerator Research Organization, Ibaraki 305-0801, Japan and <sup>‡</sup>International Institute for Carbon-neutral Energy Research (WPI-I2CNER), Kyushu University, Fukuoka 819-0395, Japan

To whom correspondence should be addressed: k-tanaka@cstf.kyushu-u.ac.jp

Tel: +81-92-802-2878, Fax: +81-92-802-2880

## Surface morphology of Nafion<sup>®</sup> films in air and water

The surface morphology of Nafion<sup>®</sup> thin films with a thickness of approximately 50 nm on silver and quartz substrates was examined by atomic force microscopy (AFM, E-sweep with an SPI3800 controller, SII NanoTechnology Inc.) using an intermittent contact mode at room temperature. A Si cantilever tip with a radius of approximately 10 nm was used and a spring constant of the lever was 1.6 N·m<sup>-1</sup>.

Figure S1 shows AFM images of Nafion<sup>®</sup> films on silver and quartz substrates observed in air and water, respectively. The root-mean-square roughness ( $R_q$ ) of all the samples was less than 1 nm.

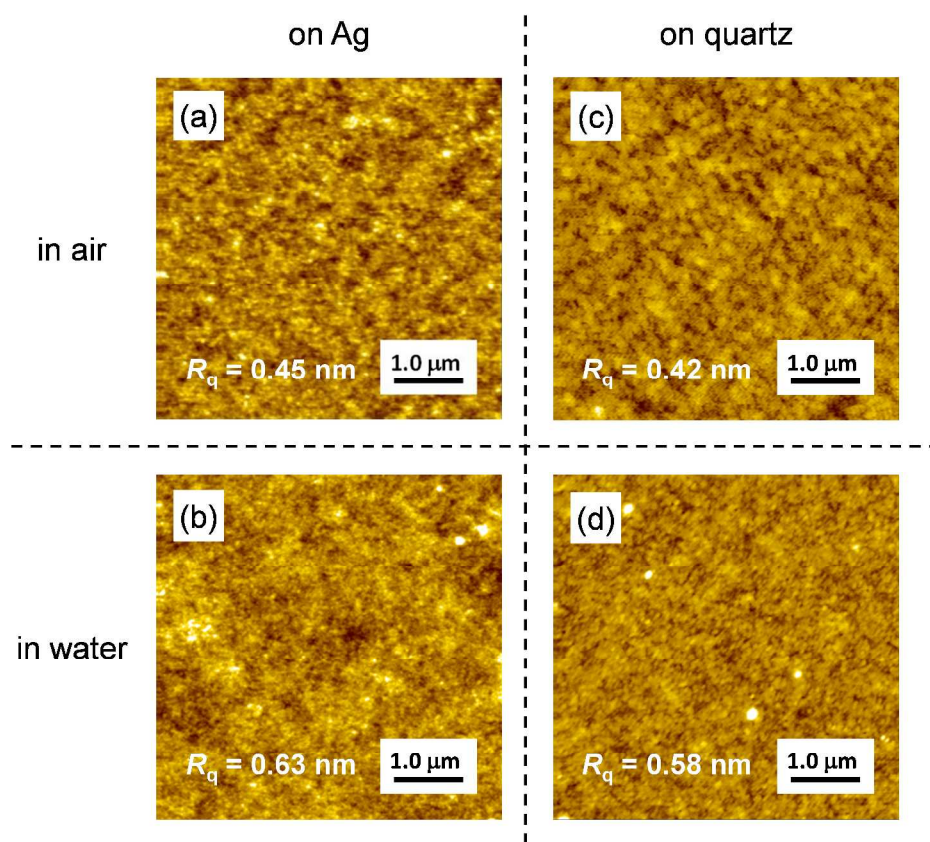

**Figure S1.** AFM images of Nafion<sup>®</sup> films on silver in (a) air and (b) water and on quartz in (c) air and (d) water, respectively. Each root-mean-square roughness ( $R_q$ ) is shown.

## Swelling ratio for different-thick Nafion<sup>®</sup> films

Swelling behavior was also examined for Nafion<sup>®</sup> films with different thicknesses. Figure S2 shows the time dependence of the swelling ratio for Nafion<sup>®</sup> films with initial thicknesses ( $h_0$ ) of 20 nm and 80 nm on silver (red) and SiO<sub>x</sub> (blue) substrates. The films thickened in three steps. Dotted lines correspond to the borders between the regimes; 1.05 for between regimes I and II and 1.26 for between regimes II and III. At a given thickness, water diffusion into Nafion<sup>®</sup> films is slower than on the SiO<sub>x</sub> substrate than on the silver one.

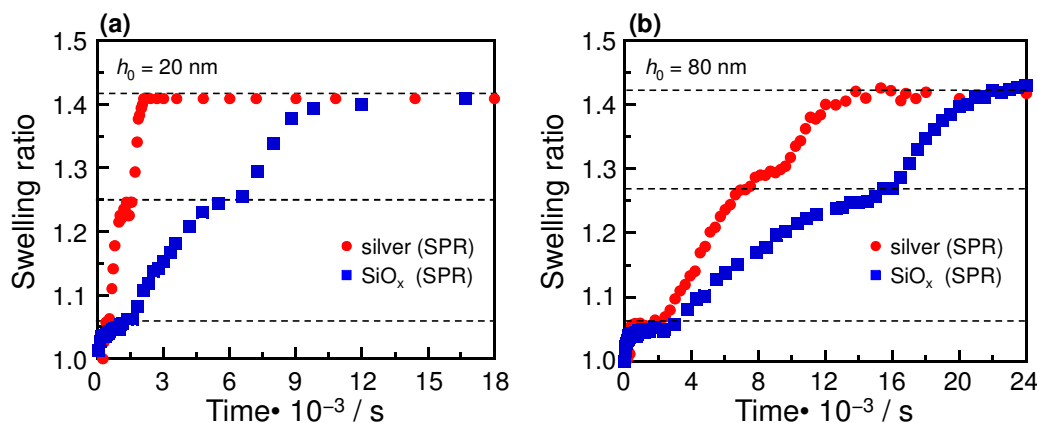

**Figure S2.** Time dependence of swelling ratio for Nafion<sup>®</sup> films on silver (red) and SiO<sub>x</sub> (blue) substrates with an  $h_0$  of (a) 20 nm and (b) 80 nm, respectively.
